# Supplementary material for: Protein profiles of Escherichia coli and Staphylococcus warneri are altered by photosensitization with cationic porphyrins
Source: Royal Society of Chemistry journal article supplement (doi:10.1039/c4pp00194j), 2015-04-24
Supplement: c4pp00194j1.pdf [file c4pp00194j1.pdf]

Supplementary Information for

**“Protein profiles of *Escherichia coli* and *Staphylococcus warneri* are altered by photosensitization with cationic porphyrins”**

**Eliaana Alves,<sup>a</sup> Ana Cristina Esteves,<sup>a</sup> António Correia,<sup>a</sup> Ângela Cunha,<sup>a</sup> Maria A. F. Faustino,<sup>b</sup> Maria G. P. M. S. Neves<sup>b</sup> and Adelaide Almeida<sup>\*a</sup>**

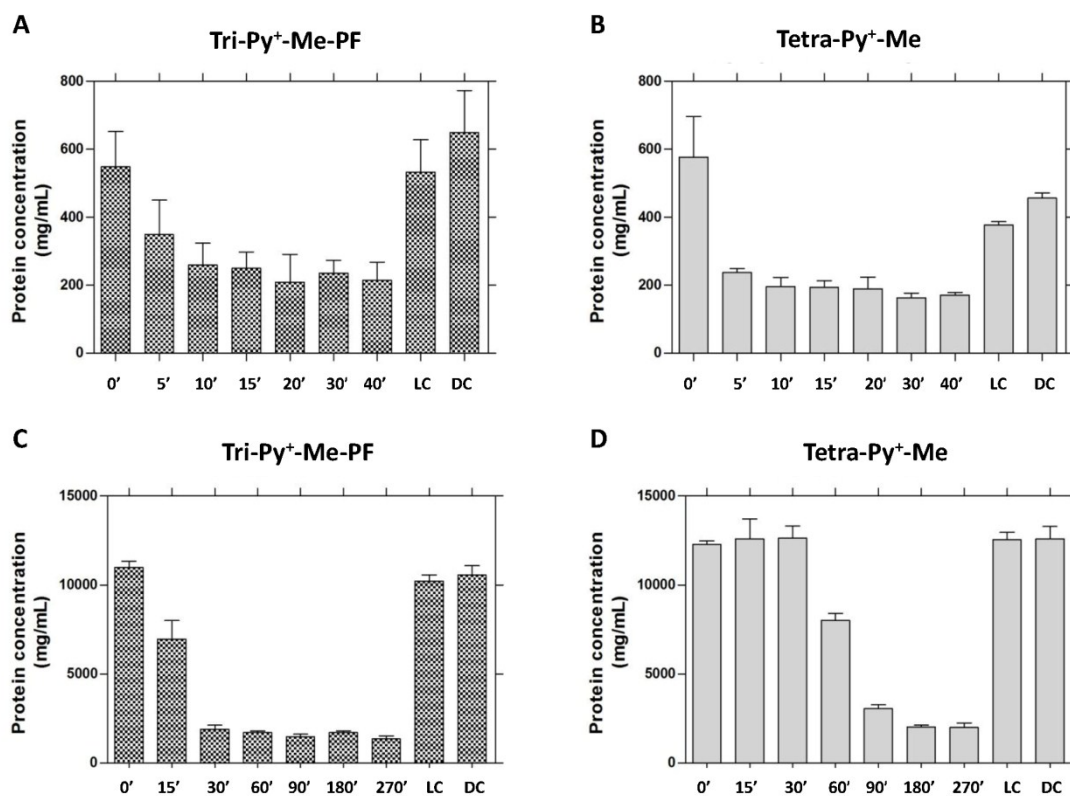

**Figure S1.** Concentration of protein (in mg per mL) in each sample of bacteria photosensitized with both porphyrins after the different irradiation times (0'-40' for *S. warneri* and 0'-270' for *E. coli*) determined by the bicinchoninic acid protein assay (BCA). **A)** *S. warneri* photosensitized with Tri-Py<sup>+</sup>-Me-PF; **B)** *S. warneri* photosensitized with Tetra-Py<sup>+</sup>-Me; **C)** *E. coli* photosensitized with Tri-Py<sup>+</sup>-Me-PF; **D)** *E. coli* photosensitized with Tetra-Py<sup>+</sup>-Me. LC: light control; DC: dark control.
